# Supplementary material for: Hip thrust and back squat training elicit similar gluteus muscle hypertrophy and transfer similarly to the deadlift
Source: PubMed Central journal article supplement — bioRxiv. 2023 Jul 5:2023.06.21.545949. Preprint. [Version 2] doi: 10.1101/2023.06.21.545949 (PMC10349977; doi:10.1101/2023.06.21.545949), 2023-07-05

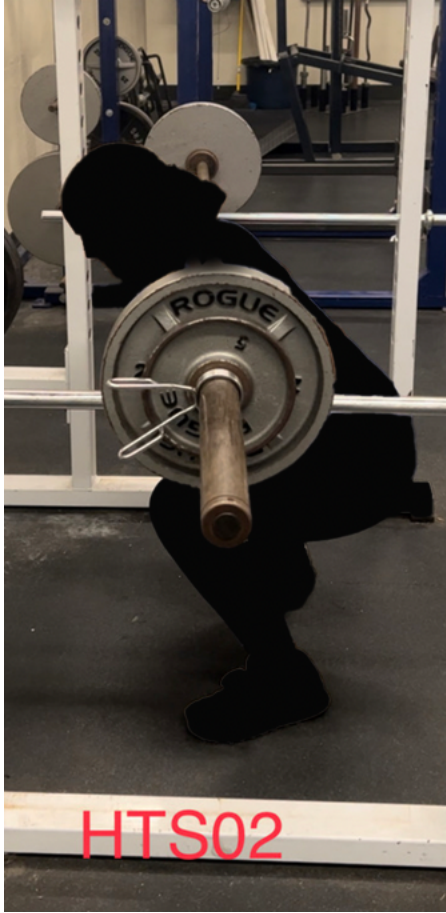

HTS02

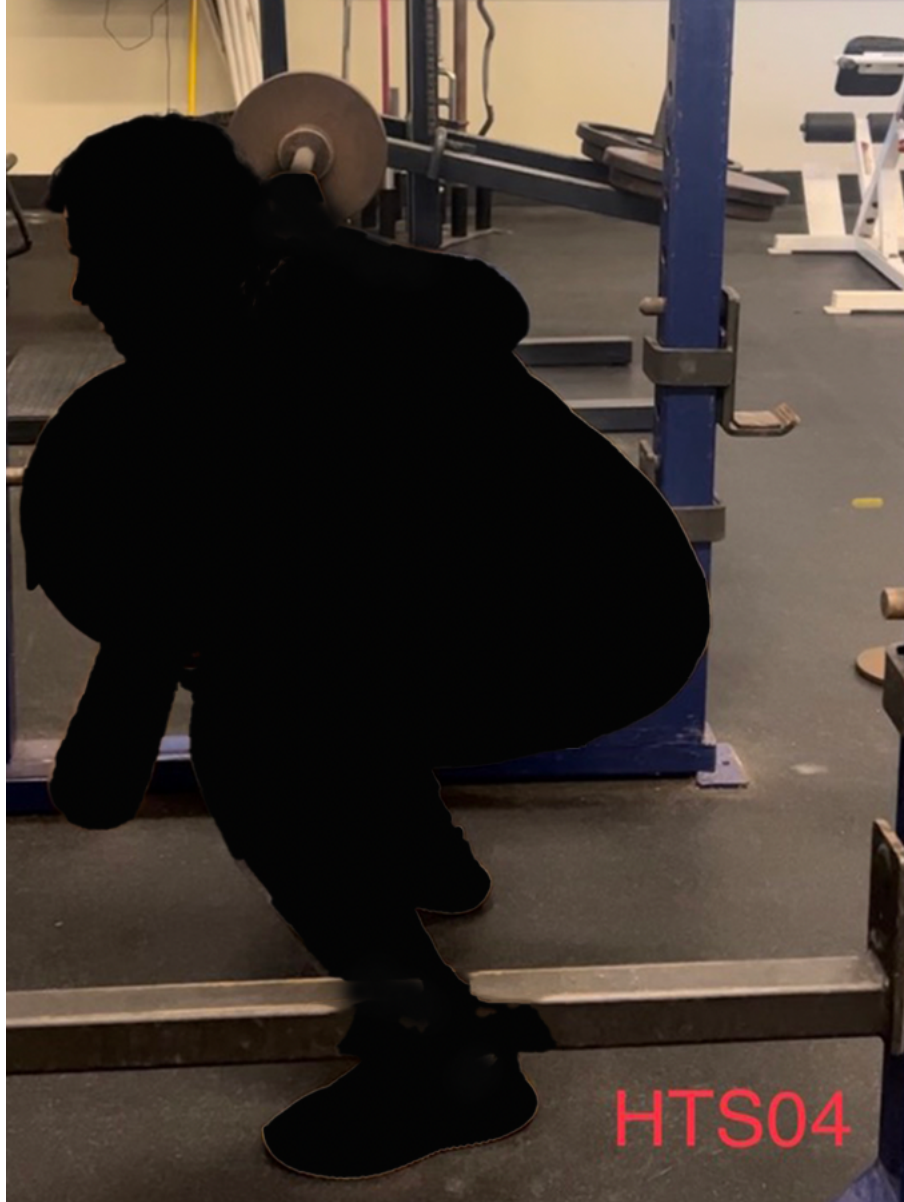

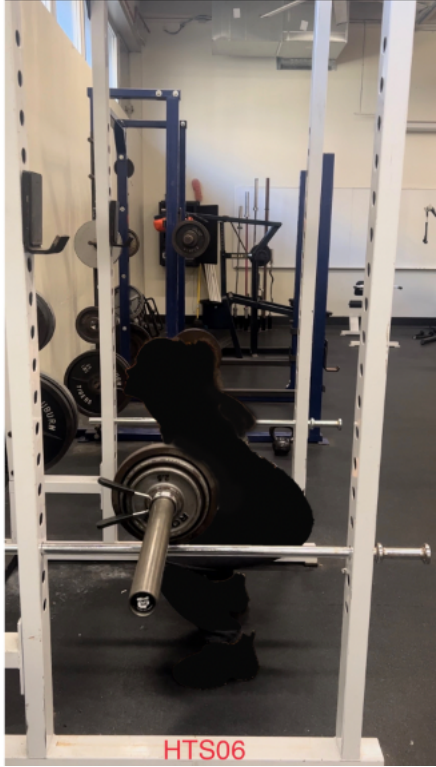

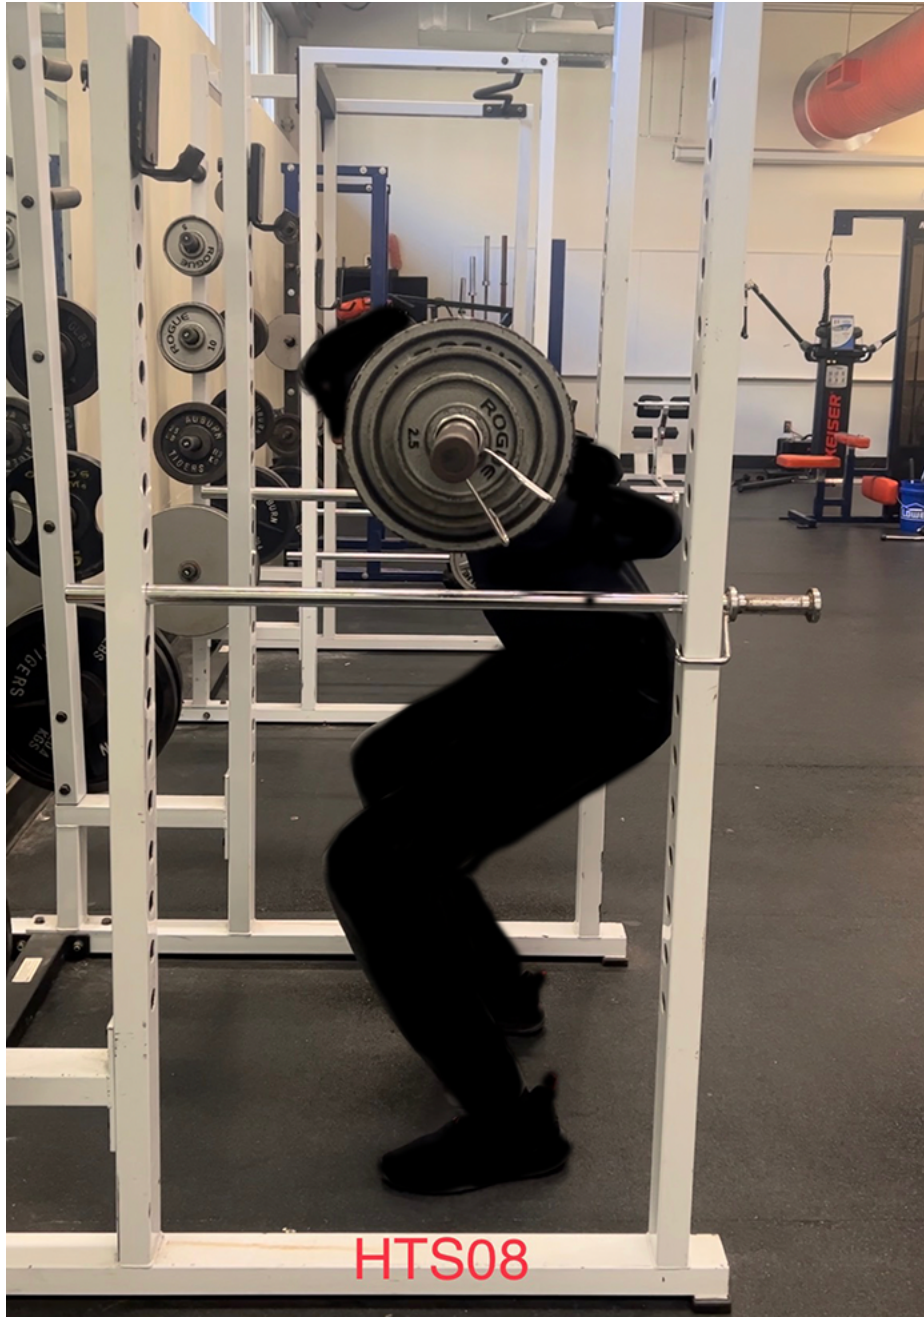

HTS08



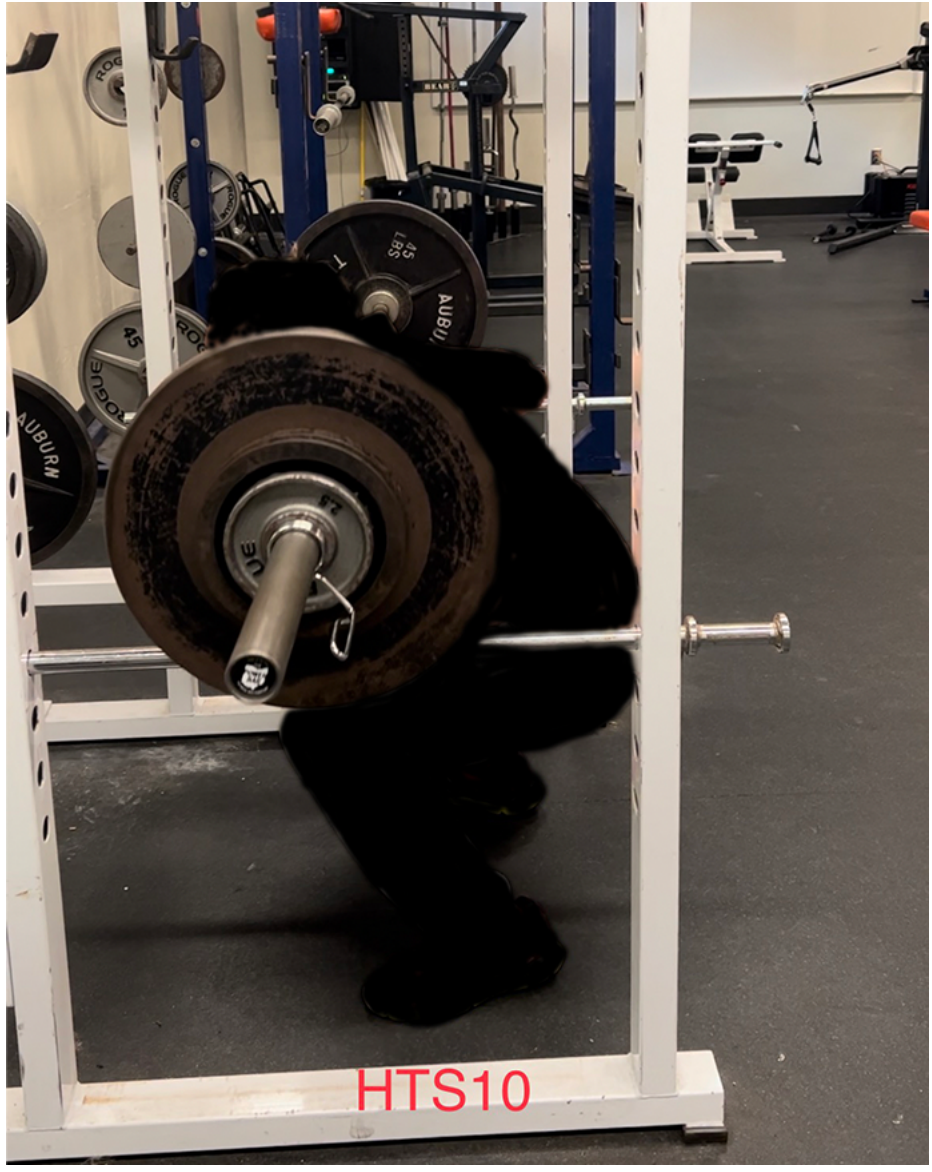

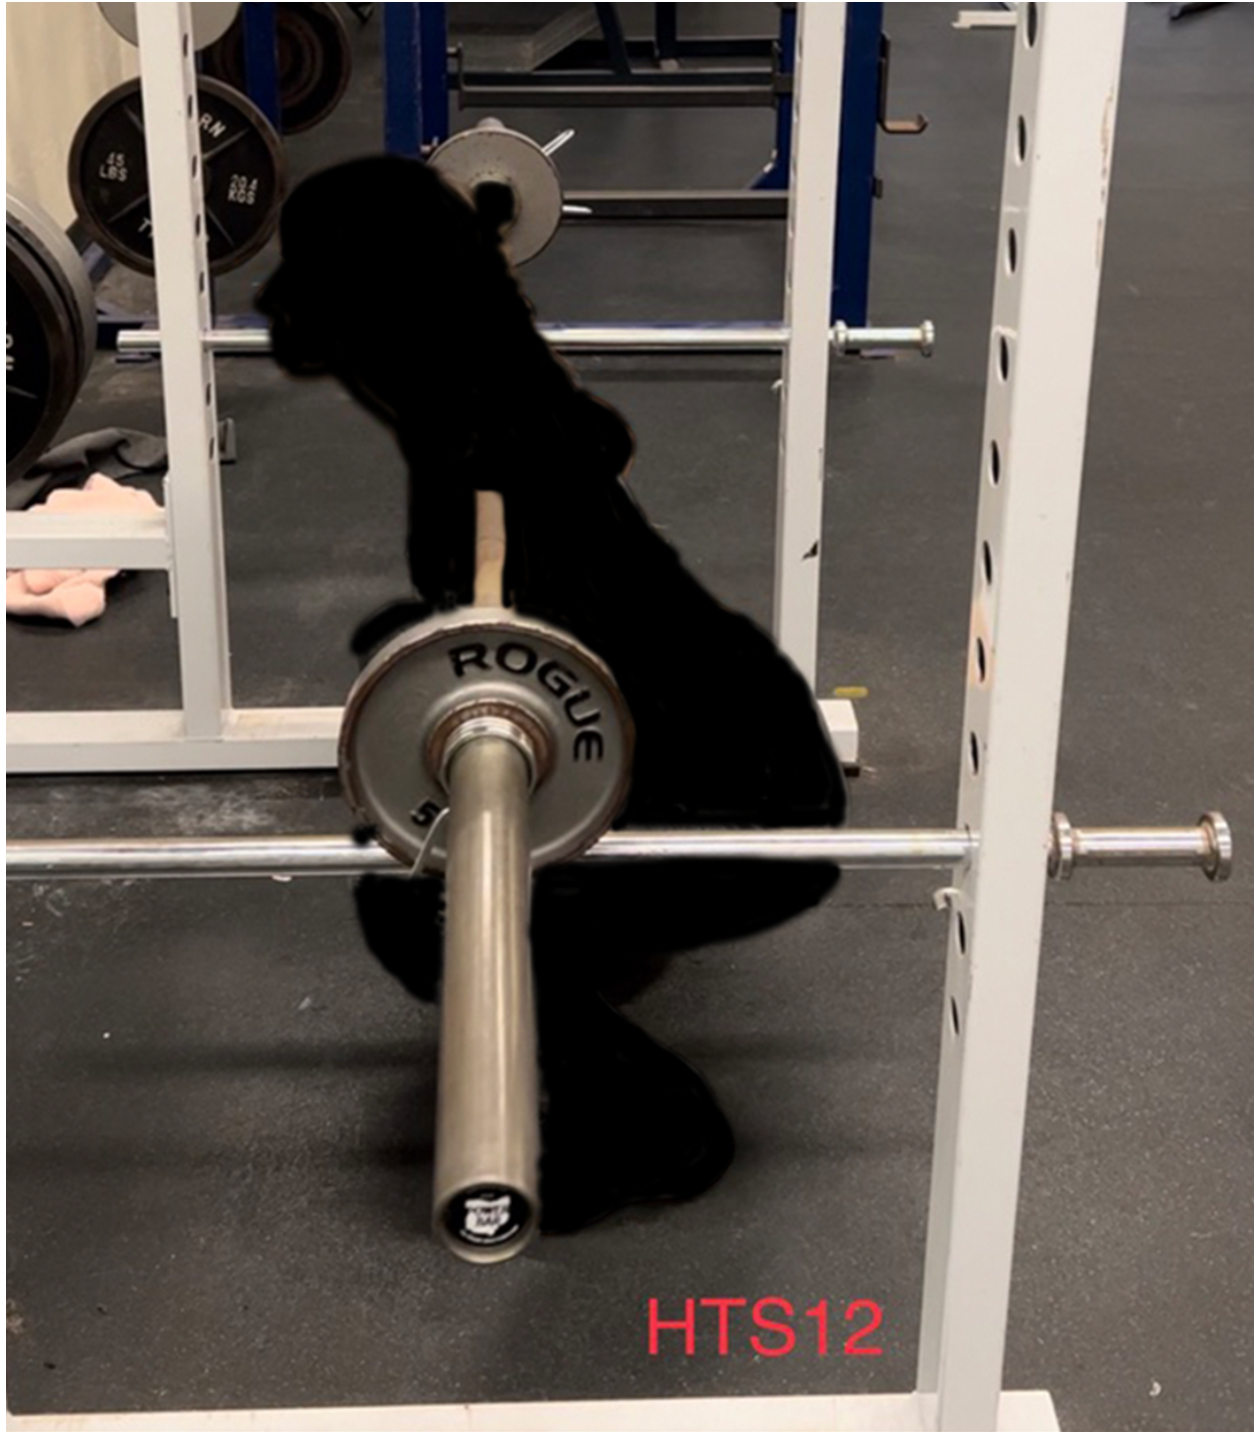

HTS12

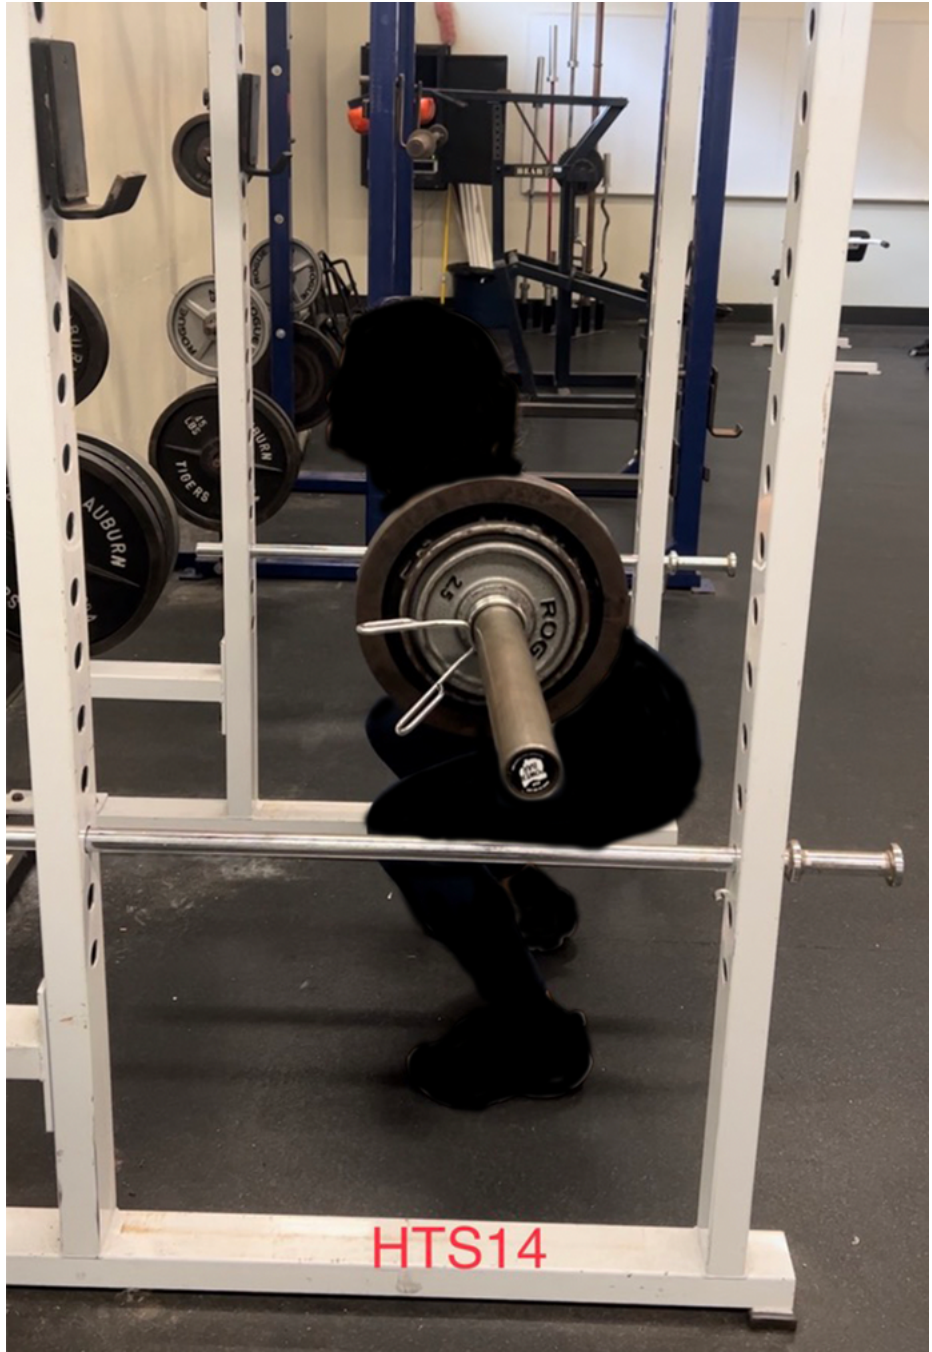

HTS14



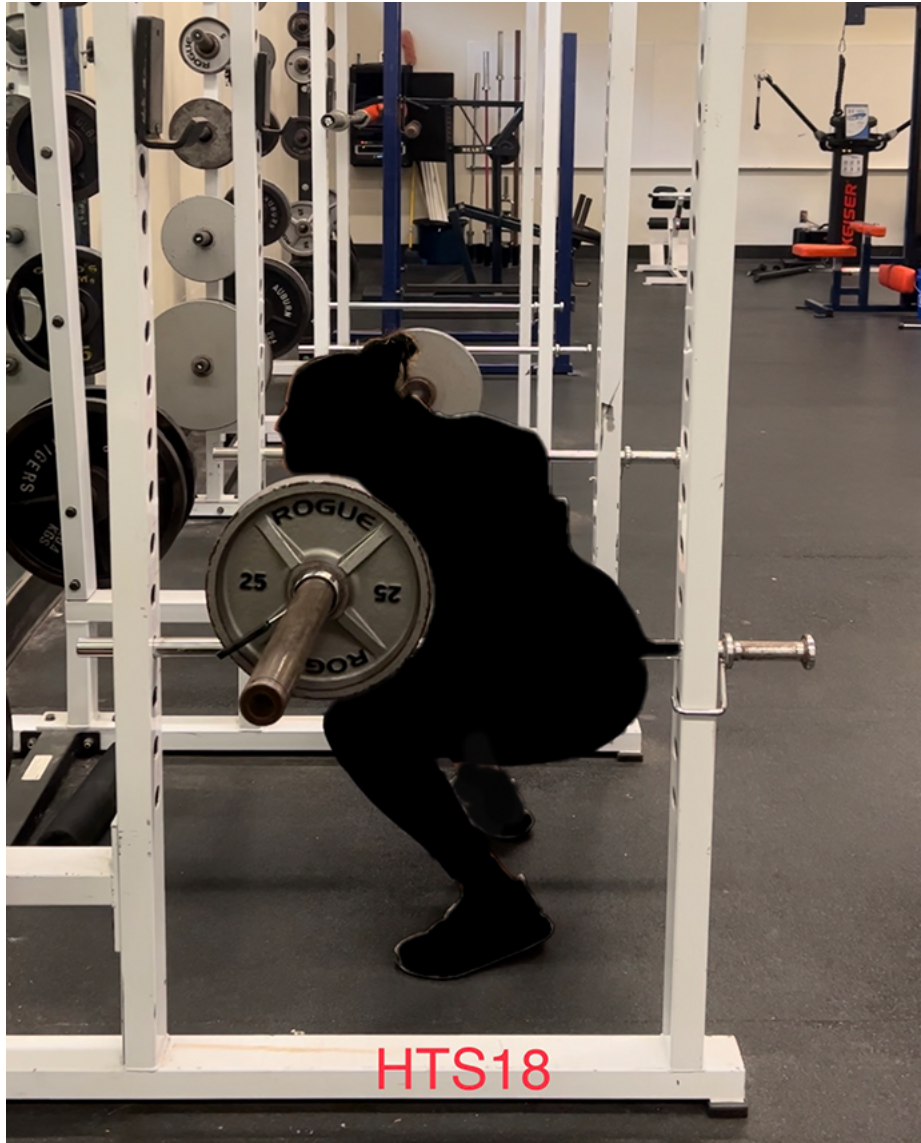

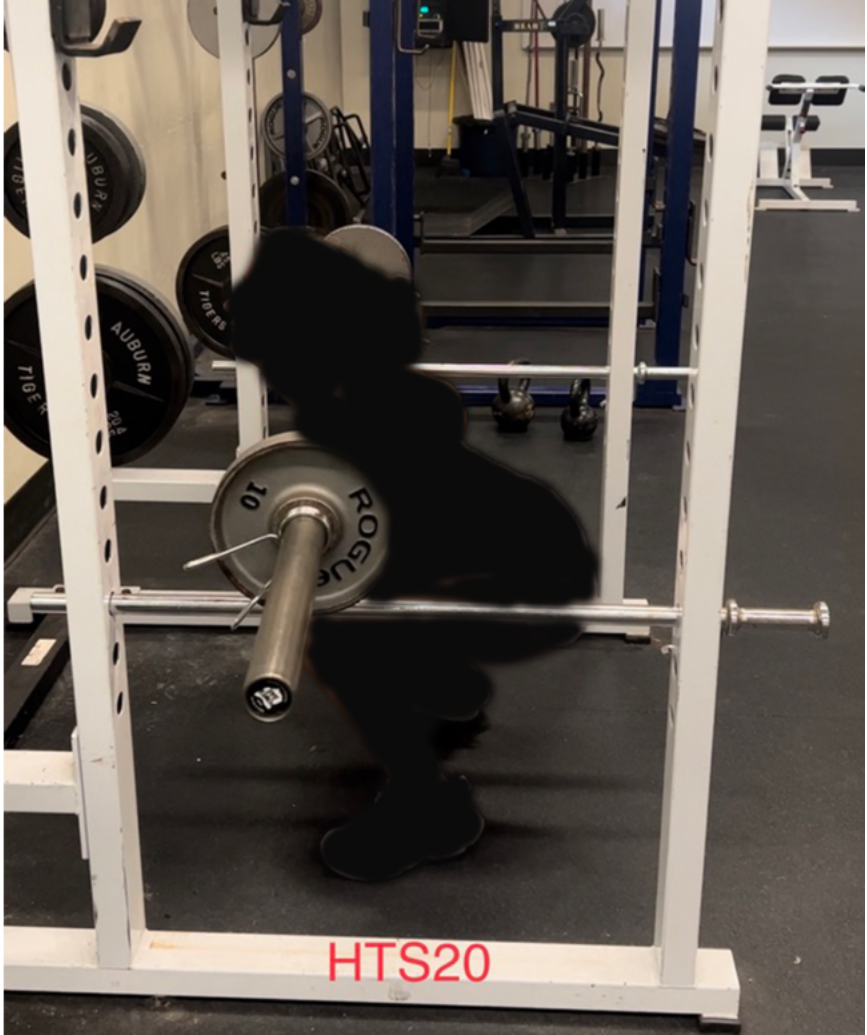



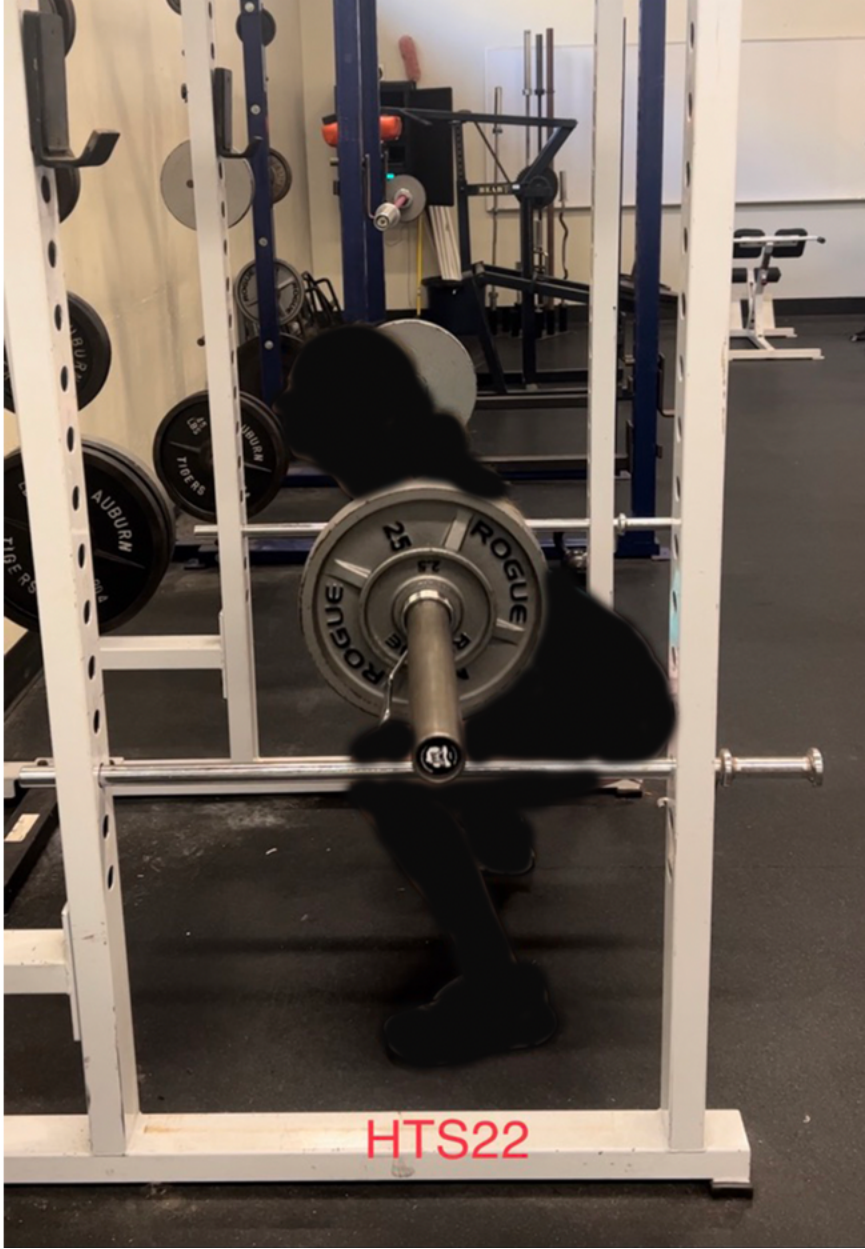

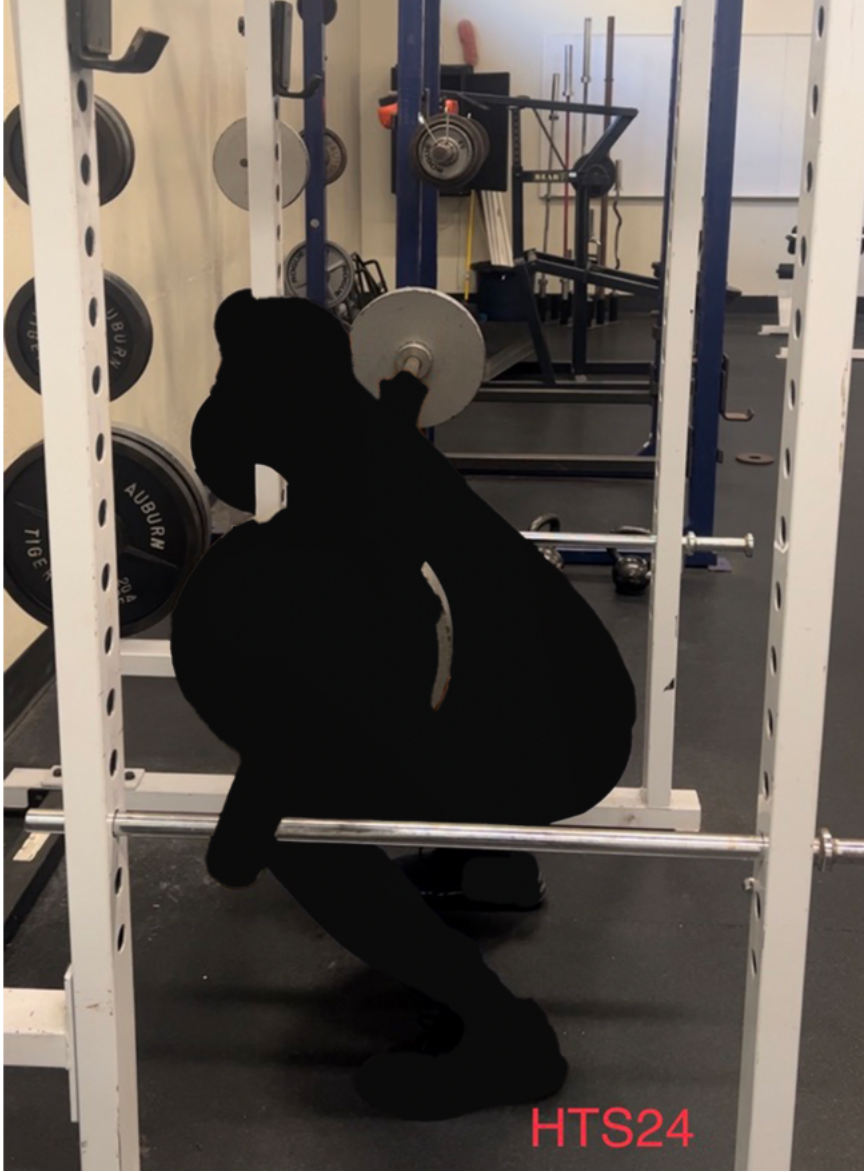

HTS24

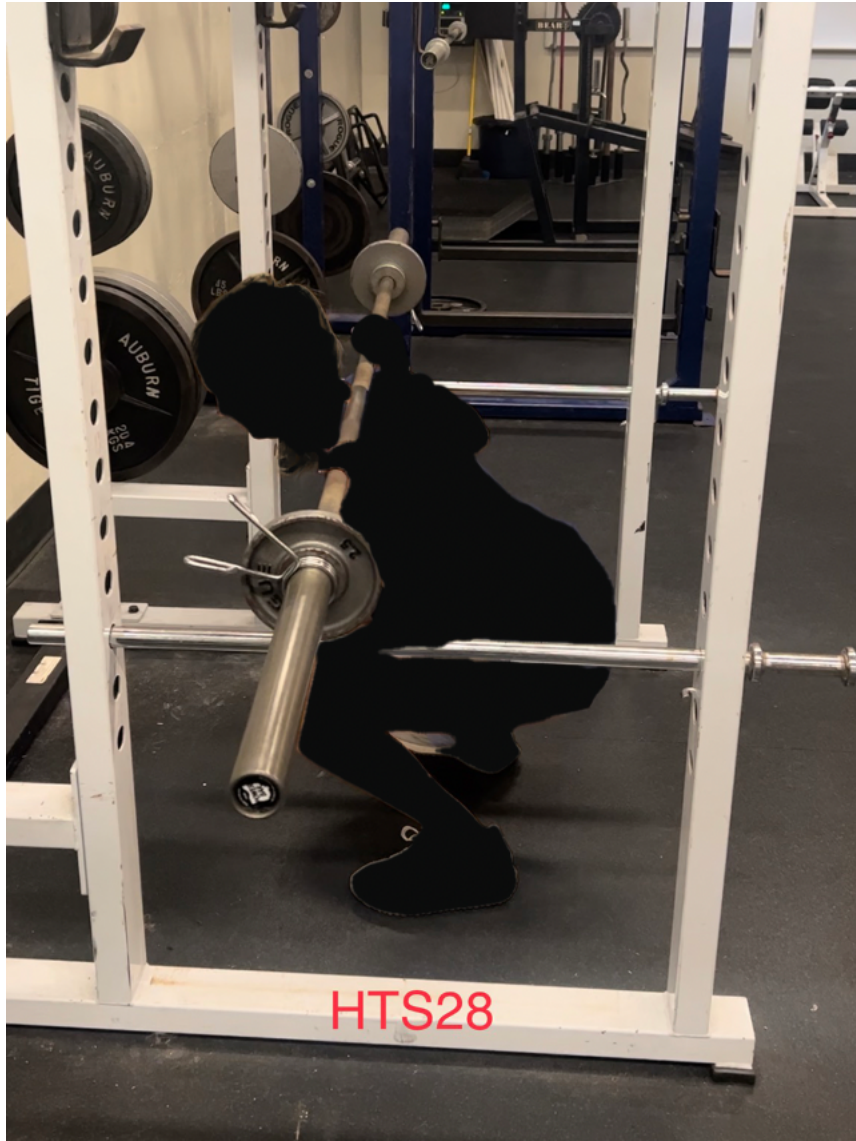

HTS28

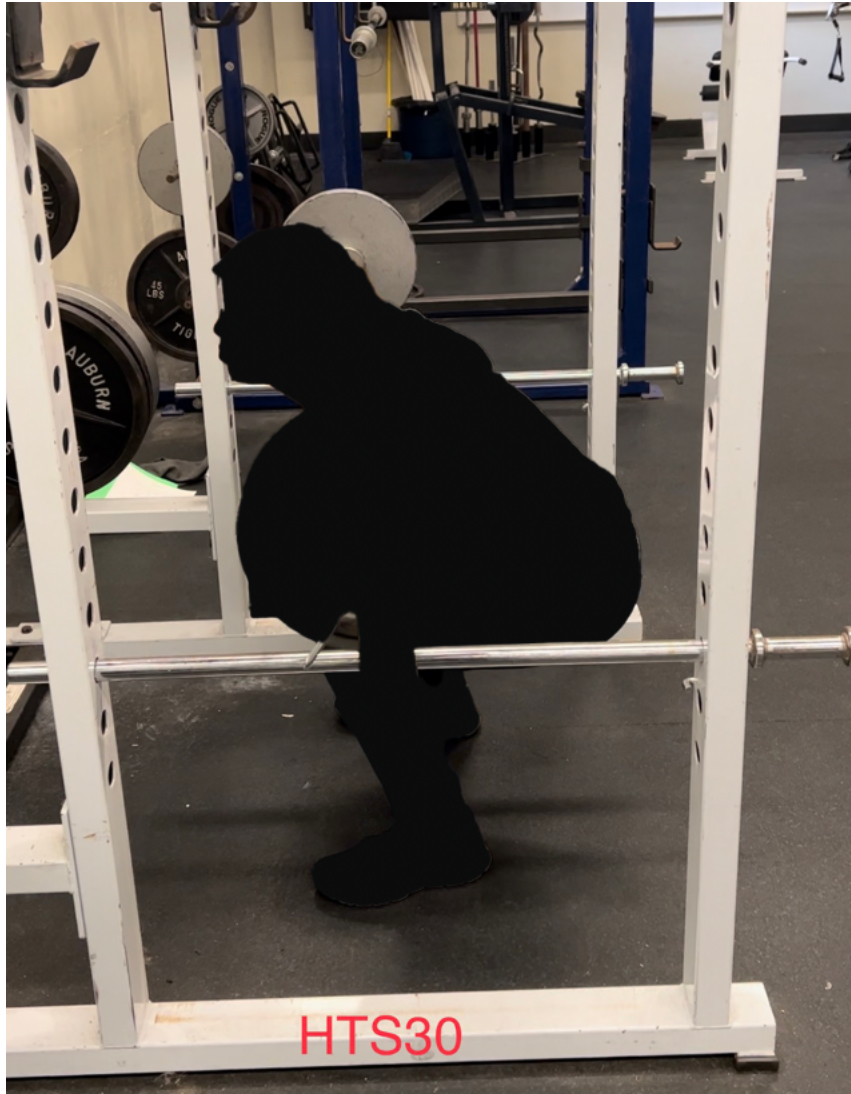

HTS30



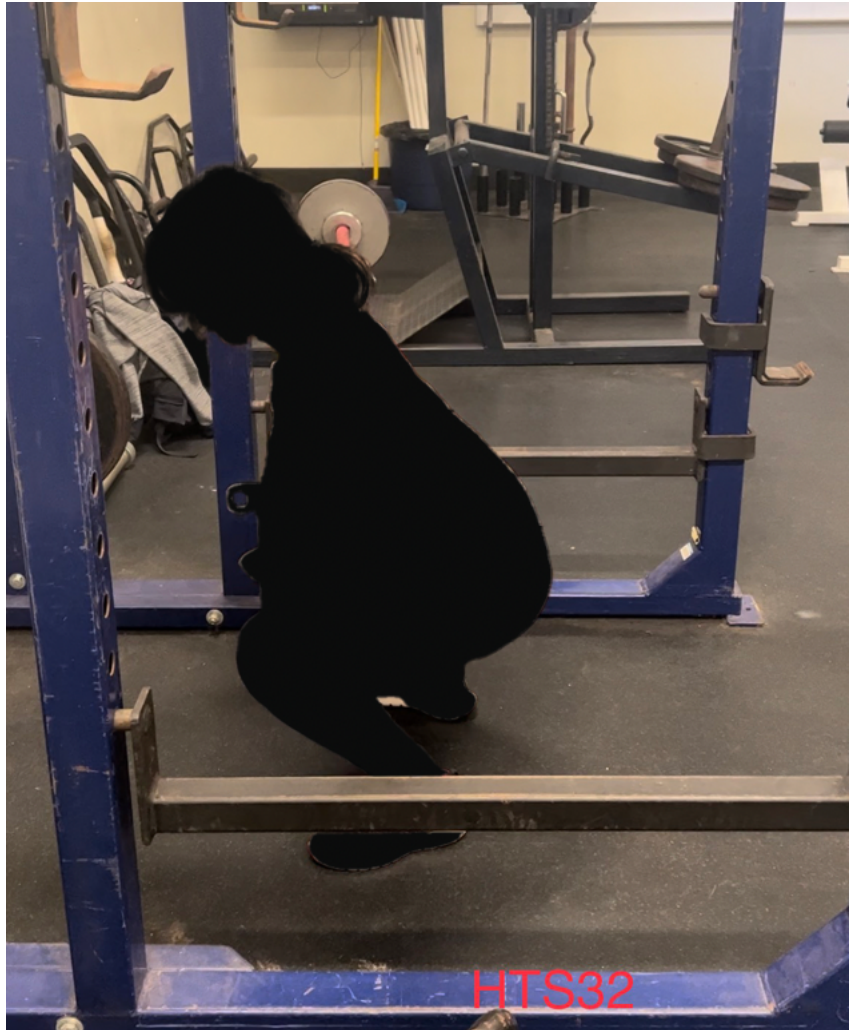



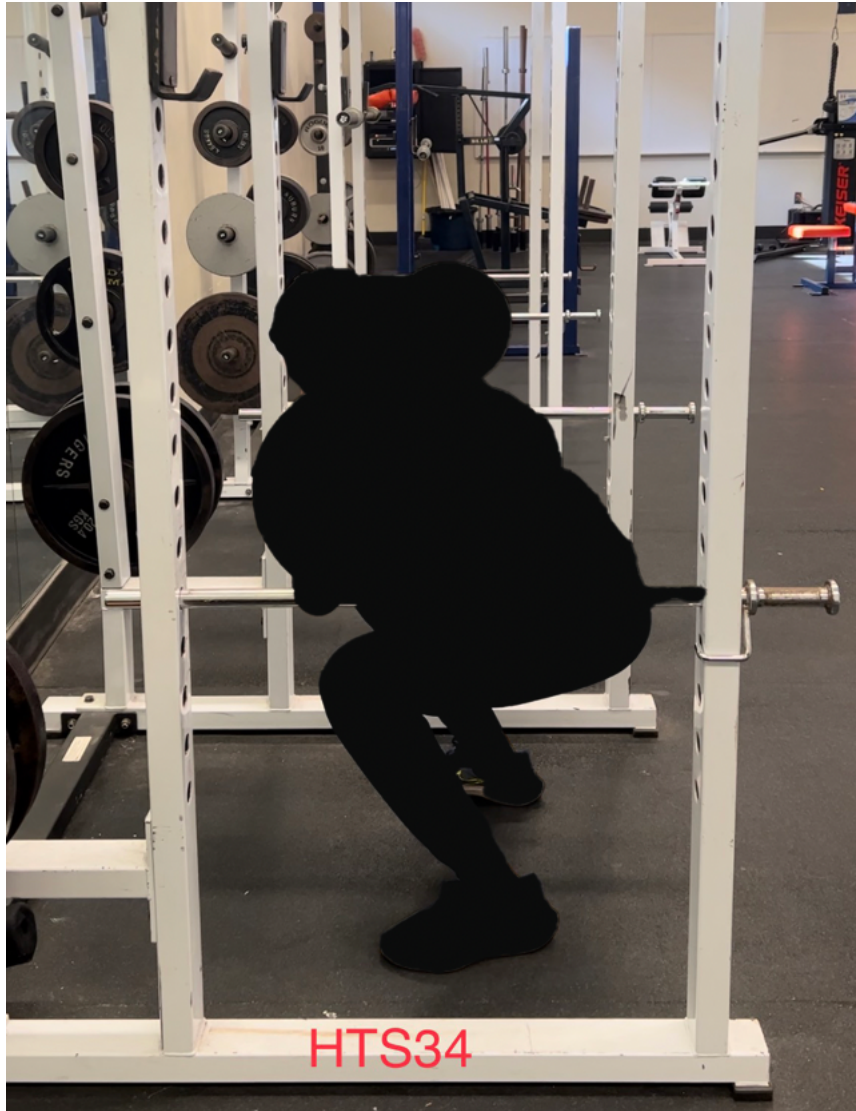

HTS34

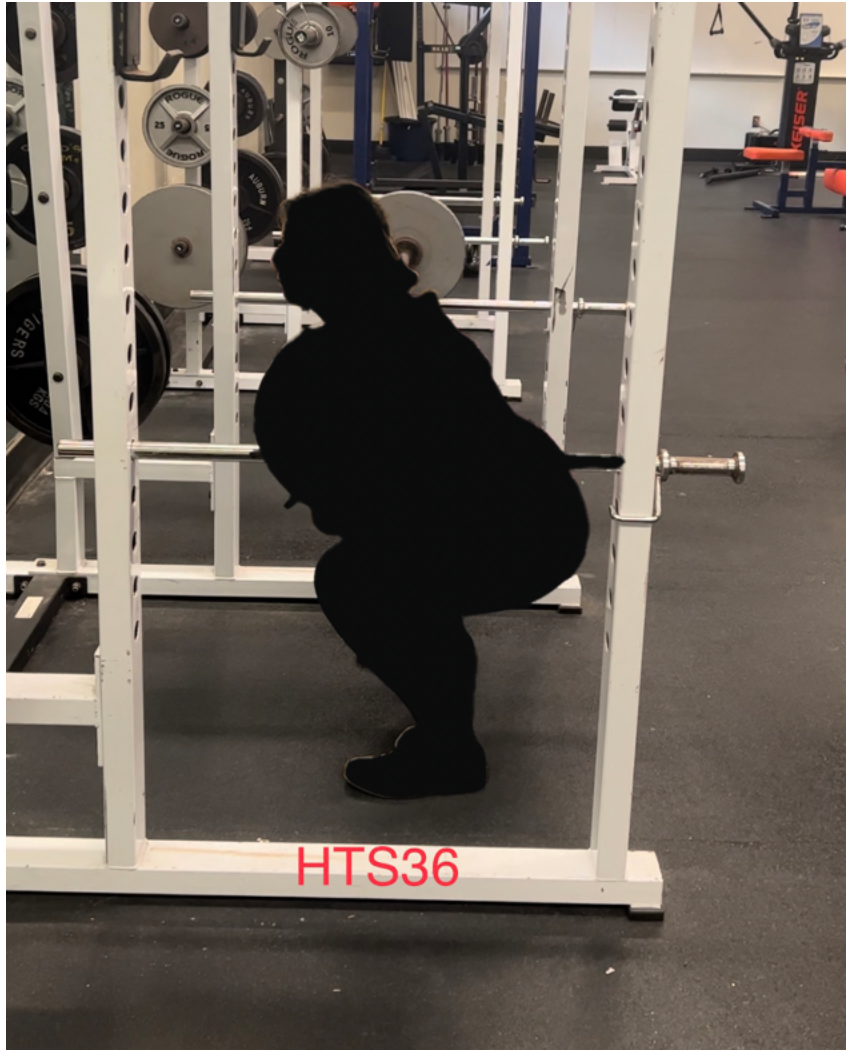

Supplement: media-2.pdf [file media-2.pdf]
